# Supplementary material for: Knockdown of GAS5 Inhibits Atherosclerosis Progression via Reducing EZH2-Mediated ABCA1 Transcription in ApoE−/− Mice
Source: PubMed Central journal article supplement — Mol Ther Nucleic Acids. 2019 Nov 12;19:84–96. doi: 10.1016/j.omtn.2019.10.034 (PMC6926212; doi:10.1016/j.omtn.2019.10.034), 2019-11-12
Supplement: mmc1.pdf [file mmc1.pdf]

OMTN, Volume 19

## Supplemental Information

**Knockdown of GAS5 Inhibits Atherosclerosis**

**Progression via Reducing EZH2-Mediated**

**ABCA1 Transcription in *ApoE*<sup>-/-</sup> Mice**

**Xiang-Dong Meng, Hua-Hong Yao, Li-Min Wang, Min Yu, Sheng Shi, Zhong-Xiang Yuan, and Jian Liu**

**Supplementary Table 1** Blood lipid levels of mice in each group (mmol/L)

| Blood lipid | C57BL/6J mice | ApoE <sup>-/-</sup> mice | <i>p</i> |
|-------------|---------------|--------------------------|----------|
| TC          | 3.21 ± 0.41   | 20.54 ± 2.12             | < 0.001  |
| TG          | 1.09 ± 0.19   | 2.04 ± 0.27              | < 0.001  |
| HDL         | 2.23 ± 0.39   | 2.01 ± 0.21              | 0.0134   |
| LDL         | 0.94 ± 0.11   | 10.17 ± 1.13             | < 0.001  |

Note: TC, total cholesterol; TG, triglycerides; HDL, high density lipoprotein; LDL, low density lipoprotein; data analysis between two groups was performed using *t*-test.

**Supplementary Table 2** Primer sequences for RT-qPCR

---

| Genes | Sequences                                                           |
|-------|---------------------------------------------------------------------|
| GAS5  | F: 5'-ACACAGGCATTAGACAGAA-3'<br>R: 5'-CCAGGAGCAGAACCATTA-3'         |
| GAPDH | F: 5'-GTCTCCTCTGACTTCAACAGCG-3'<br>R: 5'-ACCACCCTGTTGCTGTAGCCAA-3'  |
| ABCA1 | F: 5'-GGTTTGGAGATGGTTATACAATAGTTGT-3'<br>R: 5'-CCCGGAAACGCAAGTCC-3' |

---

Note: RT-qPCR, reverse transcription quantitative polymerase chain reaction; GAS5, growth arrest-specific transcript 5; ABCA1, ATP-binding cassette transporter A1; GAPDH, glyceraldehyde-3-phosphate dehydrogenase; F, forward; R, reverse.
